# Supplementary material for: Nutraceuticals against Oxidative Stress in Autoimmune Disorders
Source: PubMed Central journal article supplement (PMC7914737; doi:10.3390/antiox10020261), 2021-02-08
Supplement: antioxidants-10-00261-s001.pdf [file antioxidants-10-00261-s001.pdf]

Supplementary Materials

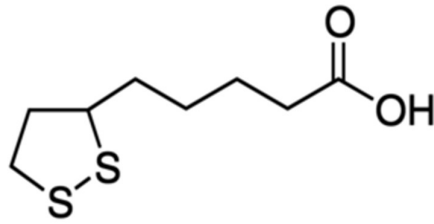

*α-Lipoic acid*

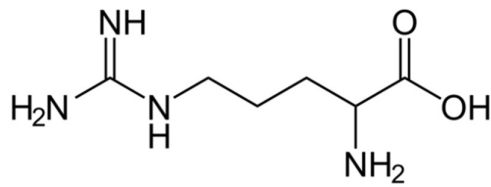

*Arginine*

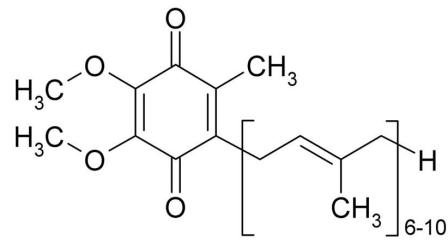

*Coenzyme Q10*

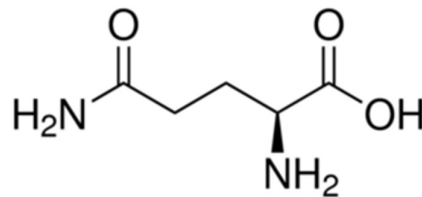

*Glutamine*

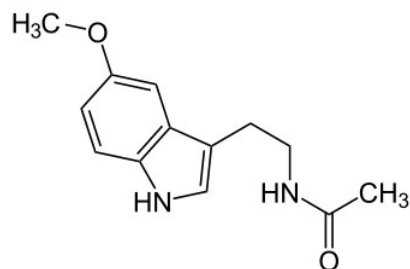

*Melatonin*

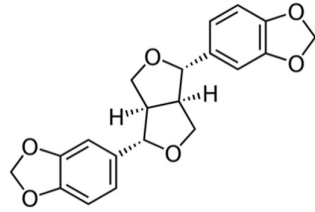

*Sesamin*

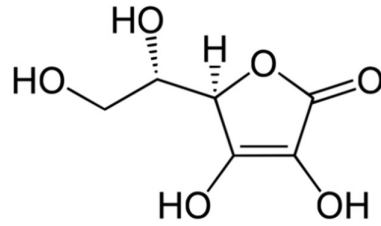

*Vitamin C*

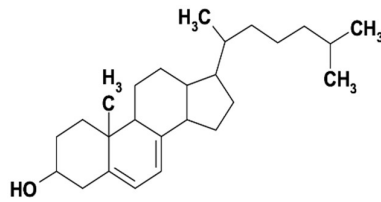

*Vitamin D*

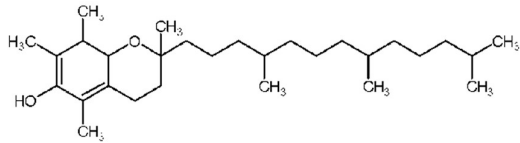

*Vitamin E*

**FLAVONOIDI**

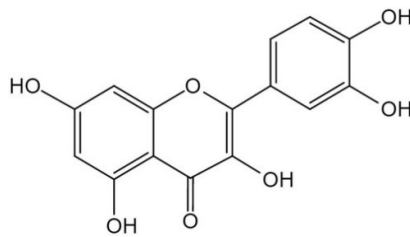

*Quercetin*

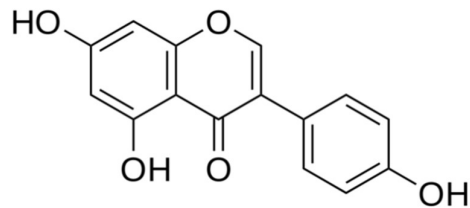

*Genistein*

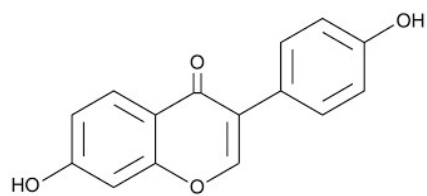

*Daidzein*

**Figure S1.** Chemical structure of the principal exogenous antioxidants.
